# Supplementary material for: The Impact of Circulating Tumor Cells on Venous Thromboembolism and Cardiovascular Events in Bladder Cancer Patients Treated with Radical Cystectomy
Source: MDPI journal article supplement (doi:10.3390/jcm9113478), 2020-10-28
Supplement: s1 [file s1]

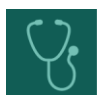

**Supplemental Table 1.** Frequencies, proportions, therapeutic management, and grading of perioperative 30-day complications in 189 patients who underwent radical cystectomy between January 2007 and December 2013.

|                                                                         | CDC grading | Management                                                                                            | Number of complications | Proportion (N=189) |
|-------------------------------------------------------------------------|-------------|-------------------------------------------------------------------------------------------------------|-------------------------|--------------------|
| <b>Gastrointestinal:<br/>149 complications (18.6%)* in 107 patients</b> |             |                                                                                                       |                         |                    |
| Ileus (paralytic)                                                       | I           | Conservative; cessation of oral intake and i.v. fluid support                                         | 10                      | 5.3%               |
|                                                                         | II          | Medical management beyond laxatives, NG tube placement, or intravenous nutrition management indicated | 9                       | 4.8%               |
|                                                                         | IIIa        | Replacement of nasogastric tube                                                                       | 2                       | 1.1%               |
| Small bowel obstruction (mechanical)                                    | IIIb        | Laparotomy                                                                                            | 0                       | --                 |
| Constipation                                                            | I           | Conservative; laxatives, i.v. fluid support                                                           | 30                      | 15.9%              |
| Clostridium difficile colitis                                           | II          | Antibiotic treatment                                                                                  | 2                       | 1.1%               |
| Gastrointestinal bleeding                                               | I           | Conservative; clinical observation or diagnostic evaluation only                                      | 0                       | --                 |
|                                                                         | II          | Blood transfusion                                                                                     | 0                       | --                 |
|                                                                         | IIIb        | Esophagogastroduodenoscopy                                                                            | 0                       | --                 |
| Emesis                                                                  | I           | Conservative; antiemetics and i.v. fluid support                                                      | 48                      | 25.4%              |
| Anastomotic bowel leak                                                  | IIIb        | Laparotomy                                                                                            | 2                       | 1.1%               |
| Diarrhea (≠ Clostridium difficile-associated)                           | I           | Conservative; antidiarrhoeals, i.v. fluid support, electrolytes                                       | 46                      | 24.3%              |
| <b>Infectious:<br/>151 complications (18.9%)* in 113 patients</b>       |             |                                                                                                       |                         |                    |
| Fever of unknown origin                                                 | II          | Conservative; antipyretics, antibiotic treatment                                                      | 6                       | 3.2%               |
| Bacteriuria (> 10 <sup>5</sup> cfu/ml; asymptomatic)                    | I           | Conservative; no antibiotic treatment                                                                 | 39                      | 20.6%              |
| Urinary tract infection (> 10 <sup>5</sup> cfu/ml; symptomatic)         | II          | Antibiotic treatment                                                                                  | 101                     | 53.4%              |
| Abscess                                                                 | II          | Antibiotic treatment                                                                                  | 1                       |                    |
|                                                                         | IIIa        | Incision and drainage                                                                                 | 0                       | --                 |
|                                                                         | IIIb        | Incision and drainage + general anesthesia                                                            | 0                       | --                 |

|                                                 |      |                                                 |   |      |
|-------------------------------------------------|------|-------------------------------------------------|---|------|
| Sepsis (SIRS in response to infectious process) | II   | Antibiotic treatment, supportive care           | 2 | 1.1% |
|                                                 | IVa  | Septic single organ dysfunction, ICU            | 0 | --   |
|                                                 | IVb  | Septic multi-organ dysfunction, ICU             | 0 | --   |
|                                                 | V    | Septic multi-organ dysfunction leading to death | 0 | --   |
| Pyelonephritis                                  | II   | Antibiotic treatment                            | 0 | --   |
| Diverticulitis                                  | II   | Antibiotic treatment                            | 1 | 0.5% |
| Gastroenteritis                                 | II   | Conservative; antiemetics, antibiotic treatment | 1 | 0.5% |
| Cholecystitis                                   | IIIb | Cholecystectomy                                 | 0 | --   |

| Wound:<br>35 complications (4.4%)* in 30 patients |      |                                                                                                    |    |      |
|---------------------------------------------------|------|----------------------------------------------------------------------------------------------------|----|------|
| Wound seroma                                      | I    | Conservative; clinical observation or diagnostic evaluation only                                   | 0  | --   |
| Wound infection (SSI)                             | II   | Antibiotic treatment                                                                               | 7  | 3.7% |
| Wound dehiscence (fascia intact)                  | I    | Conservative; clinical observation or diagnostic evaluation only, reinforced adhesive skin closure | 18 | 9.5% |
|                                                   | IIIb | Secondary surgical closure                                                                         | 8  | 4.2% |
| Fascial dehiscence/evisceration                   | IIIb | Secondary surgical closure                                                                         | 2  | 1.1% |

Table 3 (Continued)

|                                                              | CDC grading | Management                                                                                           | Number of complications | Proportion (N=189) |
|--------------------------------------------------------------|-------------|------------------------------------------------------------------------------------------------------|-------------------------|--------------------|
| Genitourinary:<br>145 complications (18.1%)* in 104 patients |             |                                                                                                      |                         |                    |
| Acute kidney injury                                          | I           | Conservative; i.v. fluid support, diuretics                                                          | 5                       | 2.6%               |
|                                                              | II          | Medical treatment and nutrition support                                                              | 1                       | 0.5%               |
|                                                              | IVa         | Dialysis                                                                                             | 0                       | --                 |
| Hydronephrosis/ureteral obstruction (new onset)              | I           | Conservative; clinical observation or diagnostic evaluation only                                     | 45                      | 23.8%              |
| Urinary leak/urinoma                                         | I           | Conservative; clinical observation or diagnostic evaluation only, deferred Foley catheter extraction | 3                       | 1.6%               |
|                                                              | IIIa        | Drainage                                                                                             | 0                       | --                 |
|                                                              | IIIb        | Ureter re-implantation/retrograde ureteral stenting                                                  | 0                       | --                 |

|    |                                                |      |                                                                                                                     |          |             |
|----|------------------------------------------------|------|---------------------------------------------------------------------------------------------------------------------|----------|-------------|
| 10 | Urinary retention                              | I    | Conservative; clinical observation or diagnostic evaluation only, re-placement of Foley catheter (neobladder/pouch) | 2        | 1.1%        |
|    | Parastomal hernia                              | I    | Conservative; clinical observation or diagnostic evaluation only                                                    | 0        | --          |
|    |                                                | IIIb | Laparotomy and surgical revision                                                                                    | 0        | --          |
|    | Urostomy ischemia                              | I    | Conservative; clinical observation or diagnostic evaluation only                                                    | 0        | --          |
|    |                                                | IIIb | Laparotomy and surgical revision                                                                                    | 0        | --          |
|    | Hematuria                                      | I    | Conservative; clinical observation or diagnostic evaluation only                                                    | 89       | 47.1%       |
|    | <b>Cardiac:</b>                                |      |                                                                                                                     |          |             |
|    | <b>42 complications (5.2%)* in 33 patients</b> |      |                                                                                                                     |          |             |
|    | <b>Arrhythmia</b>                              | I    | <b>Conservative; clinical observation</b>                                                                           | <b>4</b> | <b>2.1%</b> |
|    |                                                | II   | Medical cardioversion                                                                                               | 4        | 2.1%        |
|    |                                                | IIIb | Pacemaker, cardioversion                                                                                            | 4        | 2.1%        |
| 11 | Myocardial infarction                          | IVa  | Coronary angiography and stent implantation, ICU                                                                    | 2        | 1.1%        |
|    | Hypertension (new onset)                       | II   | Antihypertensives                                                                                                   | 13       | 6.9%        |
|    | (Acute) congestive heart failure               | IVa  | Coronary angiography, ICU                                                                                           | 4        | 2.1%        |
|    | Angina (pectoris)                              | I    | Conservative; clinical observation or diagnostic evaluation only                                                    | 4        | 2.1%        |
|    | Hypotension                                    | II   | Medical treatment                                                                                                   | 7        | 3.7%        |
|    | <b>Pulmonary:</b>                              |      |                                                                                                                     |          |             |
|    | <b>16 complications (2.0%)* in 12 patients</b> |      |                                                                                                                     |          |             |
| 12 | <b>Atelectasis</b>                             | II   | <b>Continuous positive airway pressure, physiotherapy</b>                                                           | <b>0</b> | <b>--</b>   |
|    | Pneumonia                                      | II   | Antibiotic therapy                                                                                                  | 8        | 4.2%        |
|    | Respiratory distress/dyspnea                   | I    | Oxygen, physiotherapy                                                                                               | 3        | 1.6%        |
|    | Pneumothorax                                   | I    | Conservative; clinical observation or diagnostic evaluation only                                                    | 1        | 0.5%        |
|    |                                                | IIIa | Chest tube                                                                                                          | 0        | --          |
|    | Pleural effusion                               | I    | Conservative; clinical observation or diagnostic evaluation only                                                    | 4        | 2.1%        |
|    |                                                | IIIa | Chest tube                                                                                                          | 0        | --          |

Table 3 (Continued)

|                                                    | CDC<br>grading | Management                                                       | Number of<br>complications | Proportion<br>(N=189) |
|----------------------------------------------------|----------------|------------------------------------------------------------------|----------------------------|-----------------------|
| <b>Bleeding:</b>                                   |                |                                                                  |                            |                       |
| <b>54 complications (6.7%)* in 48 patients</b>     |                |                                                                  |                            |                       |
| Anemia requiring transfusion                       | II             | Blood transfusion                                                | 38                         | 20.1%                 |
| Postoperative bleeding other than gastrointestinal | I              | Conservative; clinical observation or diagnostic evaluation only | 2                          | 1.1%                  |
|                                                    | II             | Blood transfusion/fibrinogen                                     | 0                          | --                    |
|                                                    | IIIa           | Suture ligation                                                  | 0                          | --                    |
|                                                    | IIIb           | Laparotomy and surgical revision                                 | 1                          | 0.5%                  |
| Wound hematoma                                     | I              | Conservative; clinical observation or diagnostic evaluation only | 13                         | 6.9%                  |
| <b>Thromboembolic:</b>                             |                |                                                                  |                            |                       |
| <b>6 complications (0.7%)* in 5 patients</b>       |                |                                                                  |                            |                       |
| Deep vein thrombosis                               | II             | Anticoagulation                                                  | 4                          | 2.1%                  |
| Pulmonary embolism                                 | I              | Conservative; clinical observation or diagnostic evaluation only | 2                          | 1.1%                  |
|                                                    | II             | Anticoagulation                                                  | 0                          | --                    |
|                                                    | IVa            | ICU, anticoagulation                                             | 0                          | --                    |
| Superficial phlebitis                              | II             | Conservative; heparin ointment                                   | 0                          | --                    |
| <b>Neurological:</b>                               |                |                                                                  |                            |                       |
| <b>47 complications (5.9%)* in 45 patients</b>     |                |                                                                  |                            |                       |
| Peripheral neuropathy                              | I              | Conservative; clinical observation or diagnostic evaluation only | 33                         | 17.5%                 |
| CVA/TIA                                            | II             | Antiplatelets, anticoagulation                                   | 4                          | 2.1%                  |
| Delirium/Agitation                                 | II             | Antipsychotics                                                   | 10                         | 5.3%                  |
| Vertigo                                            | II             | Medical therapy                                                  | 0                          | --                    |
| Loss of consciousness/Syncope                      | I              | Conservative; clinical observation or diagnostic evaluation only | 0                          | --                    |
| Seizure                                            | II             | Medical therapy                                                  | 0                          | --                    |
| <b>Intraoperative:**</b>                           |                |                                                                  |                            |                       |
| <b>1 complication (0.1%)* in 1 patient</b>         |                |                                                                  |                            |                       |
| Vascular injury                                    | --             | --                                                               | 0                          | --                    |
| Bowel injury                                       | --             | Revision surgery                                                 | 1                          | 0.5%                  |
| Retained foreign body                              | --             | --                                                               | 0                          | --                    |
| <b>Miscellaneous:</b>                              |                |                                                                  |                            |                       |
| <b>155 complications (19.4%)* in 98 patients</b>   |                |                                                                  |                            |                       |
| Psychological illness                              | I              | Conservative; psycho-oncological support                         | 5                          | 2.6%                  |
| Dermatitis                                         | I              | Ointment                                                         | 6                          | 3.2%                  |

|                          |      |                                                                  |    |       |
|--------------------------|------|------------------------------------------------------------------|----|-------|
| Acidosis                 | I    | Conservative; medical therapy, electrolytes                      | 2  | 1.1%  |
| Decubitus ulcer          | I    | Conservative                                                     | 14 | 7.4%  |
| Lymphocele               | I    | Conservative; clinical observation or diagnostic evaluation only | 11 | 5.8%  |
|                          | IIIa | Drainage                                                         | 1  | 0.5%  |
| Dehydration              | I    | Conservative; i.v. fluid support                                 | 0  | --    |
| Edema                    | I    | Conservative; medical therapy                                    | 60 | 31.7% |
| Hypokalemia              | I    | Conservative; medical therapy                                    | 7  | 3.7%  |
| Other rare complications | I    | Conservative                                                     | 49 | 25.9% |

\* The percentage refers to the proportion of all 801 complications.

\*\* The CDC does not apply to intraoperative complications. Thus, no grading system was used.

CDC=Clavien-Dindo classification; cfu=colony-forming units; CVA=cerebrovascular accident; ICU, intensive care unit; i.v. = intravenous; SIRS=systemic inflammatory response syndrome; SSI, surgical site infection; TIA, transient ischemic attack.

Percentages may not add up to 100%, as they are rounded.

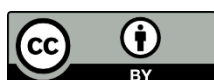

© 2020 by the authors. Submitted for possible open access publication under the terms and conditions of the Creative Commons Attribution (CC BY) license (<http://creativecommons.org/licenses/by/4.0/>).
